# Supplementary material for: LATS-YAP/TAZ controls lineage specification by regulating TGFβ signaling and Hnf4α expression during liver development
Source: PubMed Central journal article supplement (PMC4931324; doi:10.1038/ncomms11961), 2016-06-30
Supplement: ncomms11961-s1.pdf [file ncomms11961-s1.pdf]

## Supplementary Figure 1

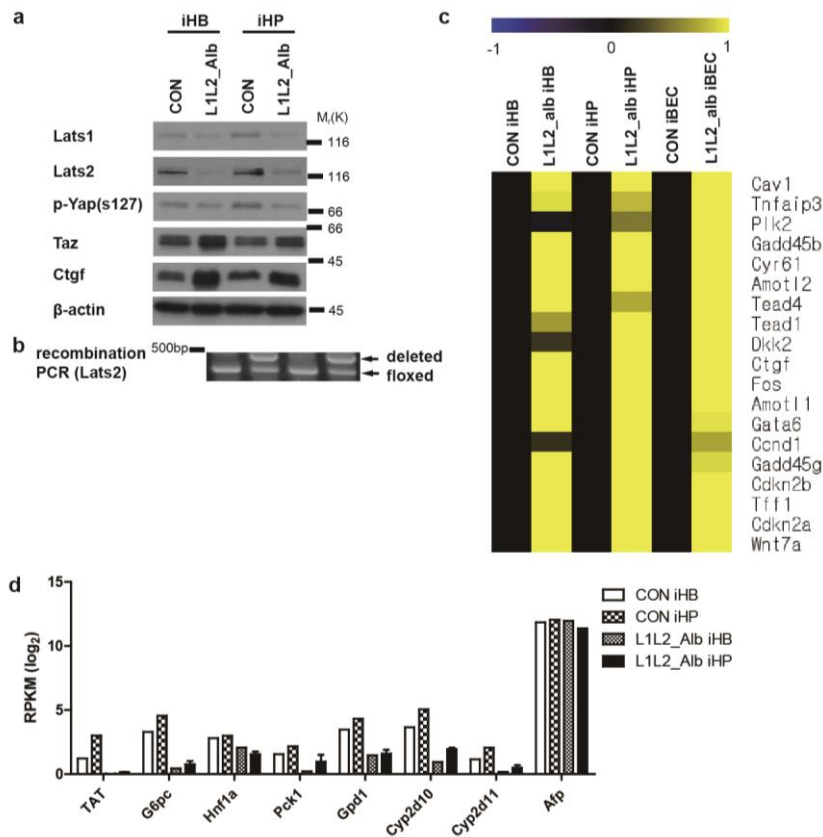

**Supplementary Figure 1. Lats1/2 deleted iHBs and iHPs showed decreased transcripts of hepatocyte related genes** (a and b) Western blots (a) and recombination PCR (b) of control and Lats1/2 deleted iHBs and iHPs (c) Heatmap for transcripts of Yap target genes from RNA-sequencing results with control and Lats1/2 deleted iHBs, iHPs and iBECs. (d) mRNA expression levels of hepatocyte-related genes from the RNA sequencing data with control and Lats1/2 deleted iHBs and iHPs. The data are presented as means  $\pm$  SEM.

## Supplementary Figure 2

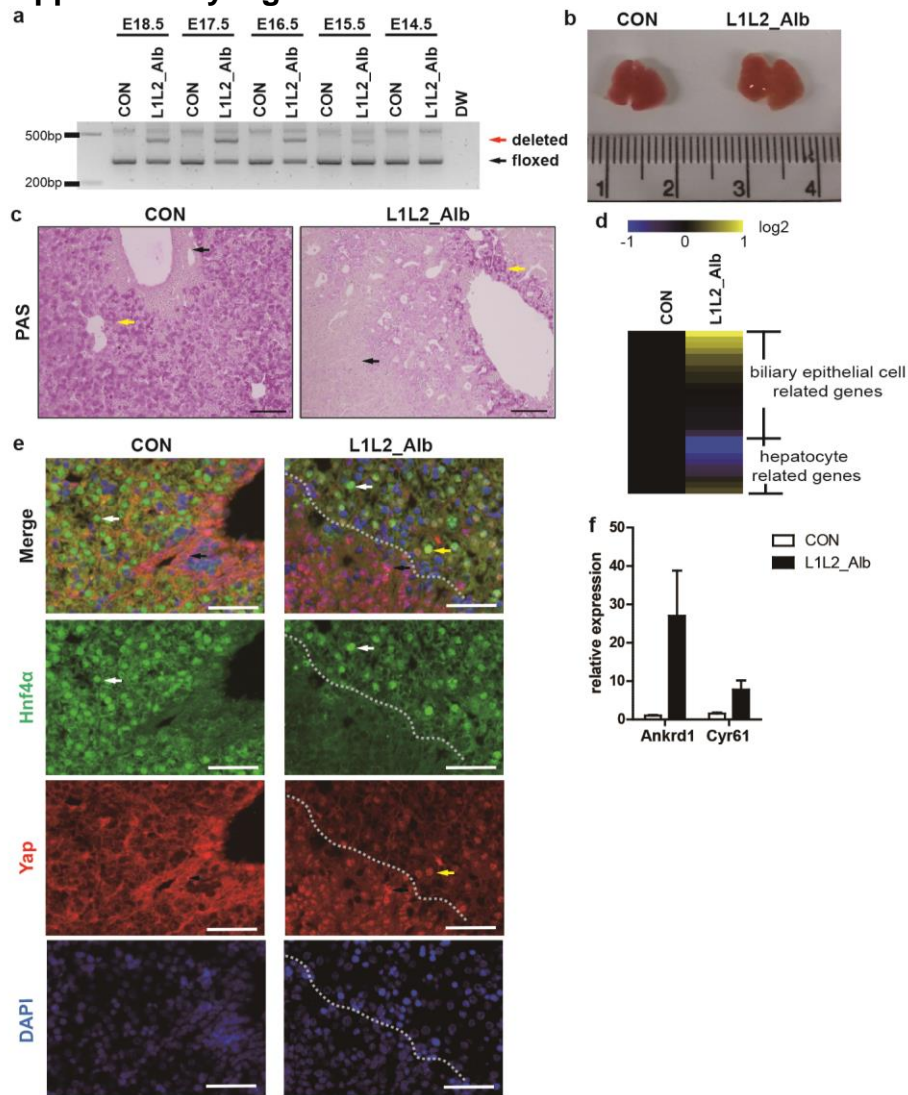

**Supplementary Figure 2. Loss of Lats1/2 enhances immature biliary epithelial expansion by**

**activating Yap and Taz** (a) Recombination PCR of control and Lats1/2 deleted livers at each indicated embryonic day. (b) A photograph of postnatal day (P) 1 livers of the indicated genotypes. (c) PAS staining for detection of mature hepatocytes in control and L1L2<sub>alb</sub> livers obtained at P1. Scale bars indicate 50  $\mu$ m. (d) Heat map for BEC- and hepatocyte-related genes, as assessed by microarray analysis of mRNAs from control and L1L2<sub>Alb</sub> livers sampled at P1. (e) Representative images obtained by immunofluorescence with antibodies against Yap and HNF4 $\alpha$  in control and L1L2<sub>alb</sub> livers sampled at P1. The white arrow indicates HNF4 $\alpha$ -positive signals, and the yellow arrow indicates Yap and HNF4 $\alpha$  double-positive signals. Scale bars indicate 100  $\mu$ m. (f) Relative mRNA expression levels of the typical Yap target genes, Ankrd1 and Cyr61, in embryonic day (E) 17.5 whole livers, as assessed by qRT-PCR. The data are presented as means  $\pm$  SEM.

### Supplementary Figure 3

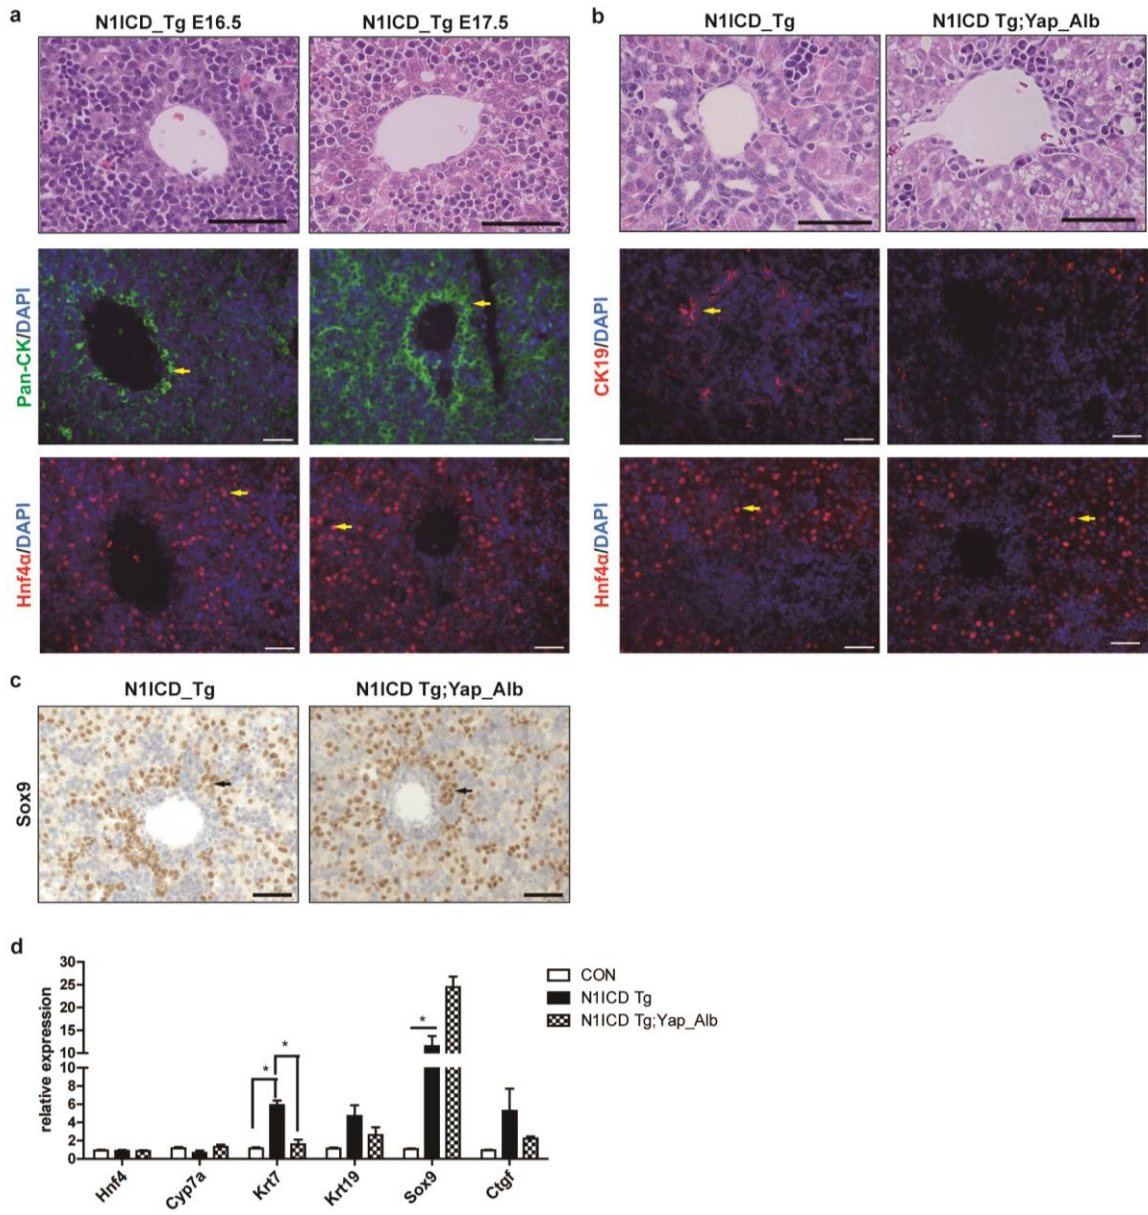

**Supplementary Figure 3. Deficiency of Yap reduced biliary epithelial cell expansion by N1ICD over-expression** (a) Representative H&E and immunofluorescence staining with anti-pan-CK and DAPI, and anti-Hnf4a and DAPI of N1ICD Tg livers at each indicated embryonic day. Yellow arrow indicate positive to anti-Pan-CK or anti-Hnf4a. (b) Representative H&E and immunofluorescence staining with anti-CK19 and DAPI, and anti-Hnf4a and DAPI of N1ICD Tg and N1ICD Tg;YAP\_Alb livers at postnatal day 1 (P1). Yellow arrows indicate positive to anti-CK19 or anti-Hnf4a. (c) Representative immunohistochemistry staining with anti-Sox9 of N1ICD Tg and N1ICD Tg;Yap\_Alb livers at P1. Black arrows indicate positive to anti-Sox9. (d) Relative mRNA expression levels of indicated genes in control, Yap\_Alb, N1ICD Tg\_Alb and N1ICD Tg;Yap\_Alb livers at P1. Scale bars indicate 50  $\mu$ m; the data are presented as means  $\pm$  SEM;  $n=3$ , \* $p < 0.05$  (Student's *t*-test).

## Supplementary Figure 4

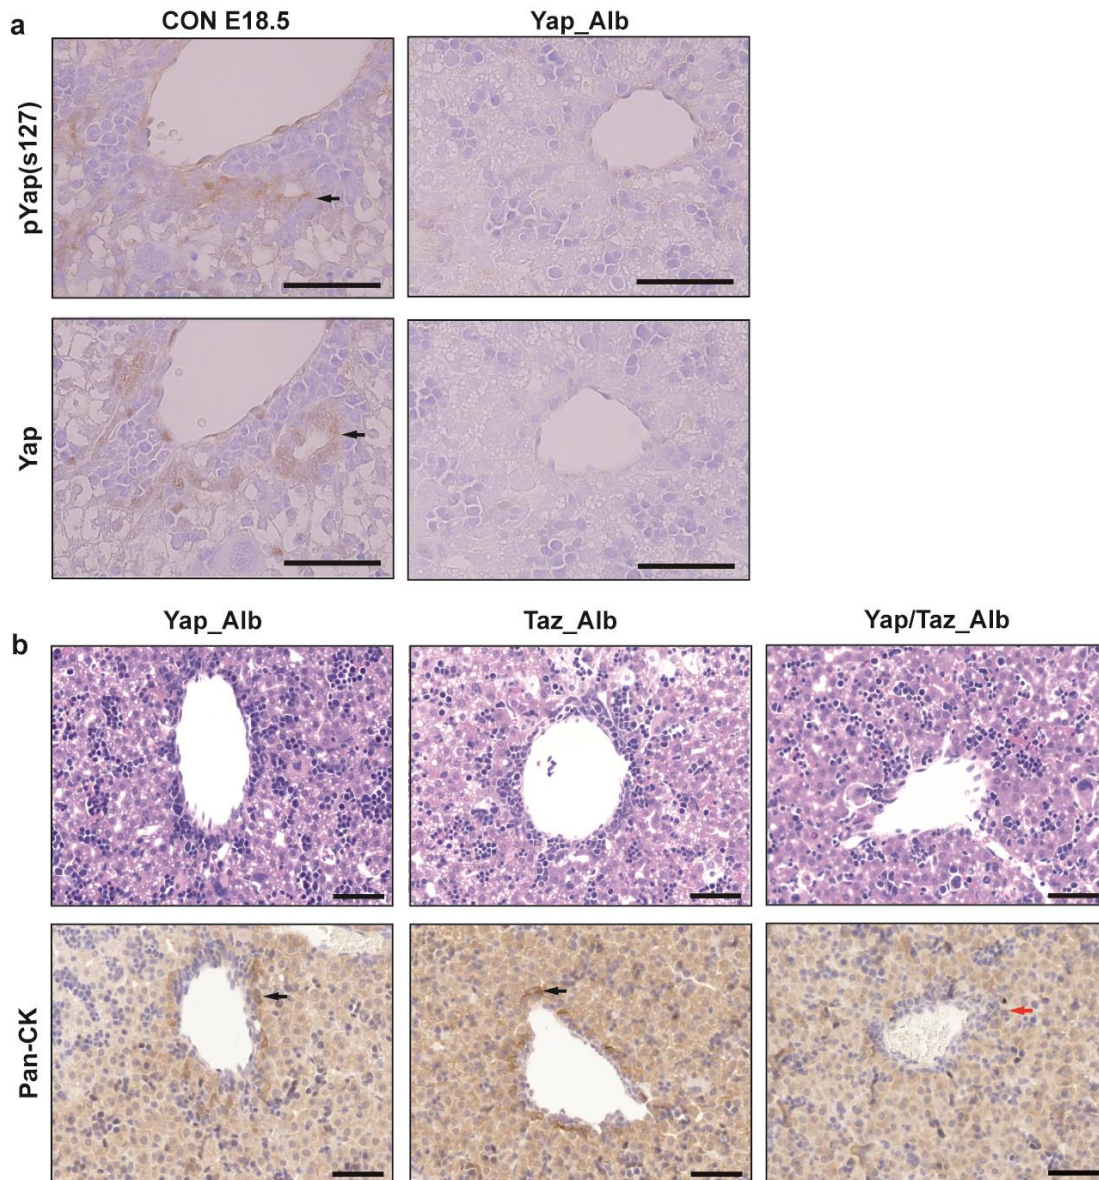

**Supplementary Figure 4. Yap is activated during ductal plate formation** (a) Representative immunohistochemistry performed with anti-pYap (S127) and anti-Yap in control livers at E18.5 and P1 Yap-knockout mice. Black arrows indicate positive signals to pYap or Yap. (b) Representative images of H&E and anti-panCK staining in livers from mice of the indicated genotypes. Black arrows indicate positive signals to pan-CK and red arrow indicates negative signal to pan-CK. Scale bars indicate 50  $\mu$ m.

## Supplementary Figure 5

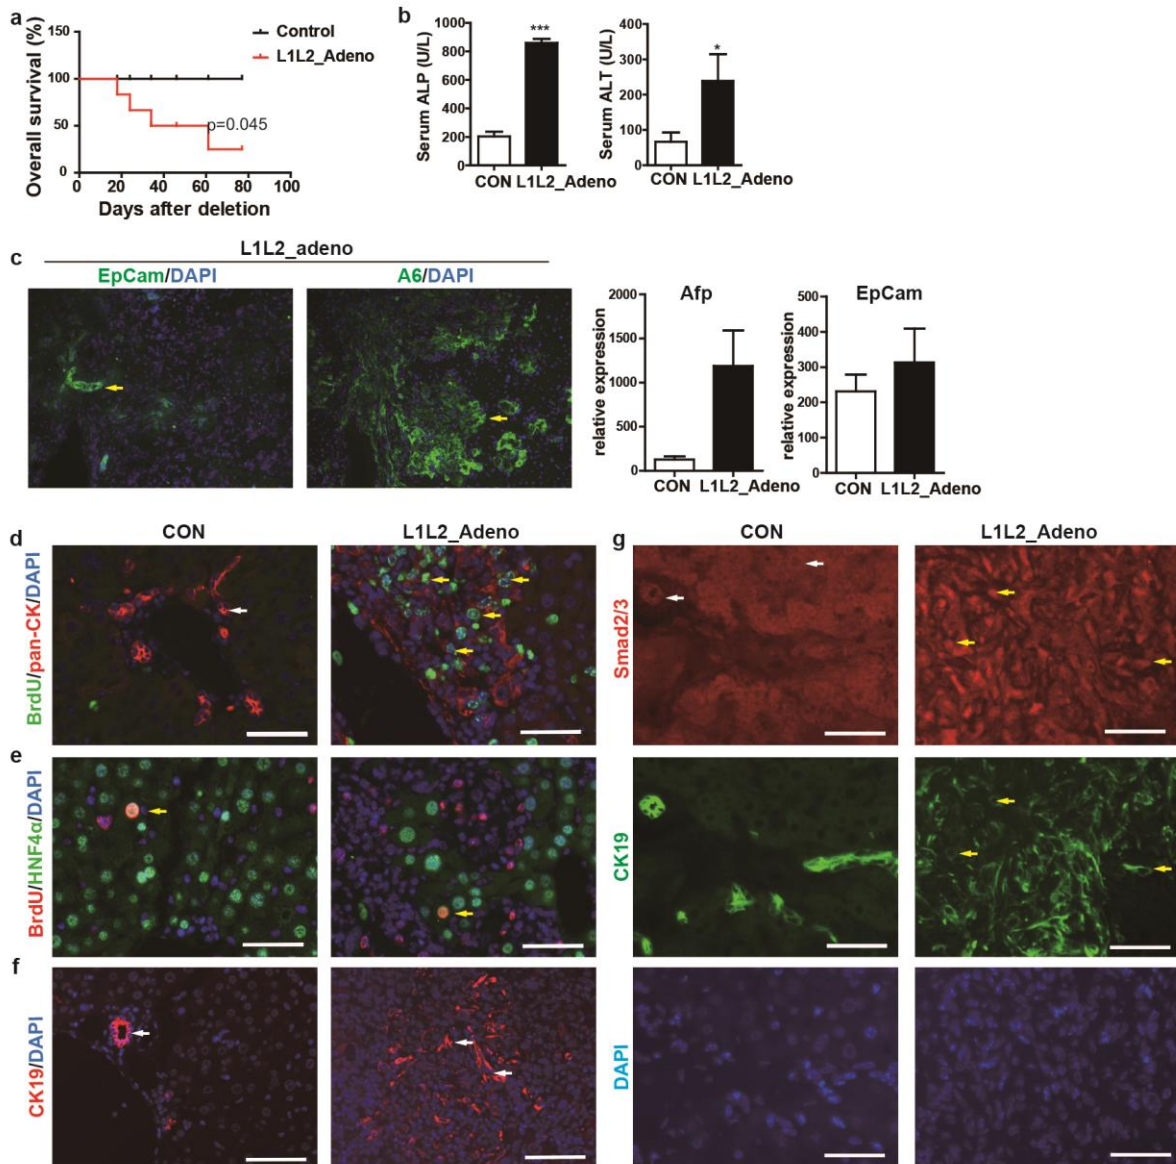

**Supplementary Figure 5. Deletion of Lats1/2 in adult liver triggers the expansion of biliary**

**epithelial cells (BECs) and fibroblasts** (a) Survival curves for control and Lats1<sup>-/-</sup>;Lats2<sup>fl/fl</sup> adeno-Cre injected mice (L1L2\_Adeno) ( $2 \times 10^8$  PFU; n = 6 mice per group; Log-rank test). (b) Serum test against alkaline phosphatase (ALP) and alanine aminotransferase (ALT) in control and L1L2\_Adeno mice blood (n=3) (c) Expanded biliary cells expressed mainly A6 which is an oval cell reaction marker plus some Epcam which is a progenitor marker (left), whereas mRNA level of Afp, but not Epcam, was highly expressed in Lats-deficient livers (right). Yellow arrows indicate positive signals to EpCam or A6. (d and e) Representative immunofluorescence images obtained with anti-BrdU and anti-panCK (d) or anti-Hnf4 $\alpha$  (e). Yellow arrows indicate double-positive cells, and white arrows indicate cells positive for BrdU alone. Scale bars indicate 100  $\mu$ m. (f) Representative immunofluorescence images obtained with anti-CK19. White arrows indicate positive to anti-CK19. Scale bars indicate 100  $\mu$ m (g) Single channel images of immunofluorescence staining results against anti-CK19, anti-Smad2/3 and DAPI (related to Fig. 5f). White arrows indicate cytoplasmic staining of Smad2/3 and yellow arrows indicate nuclear staining of Smad2/3. Scale bars indicate 50  $\mu$ m.

The data are presented as means  $\pm$  SEM; n=3, \*p < 0.05, \*\*\*p < 0.001 (Student's t-test).



## Supplementary Figure 6

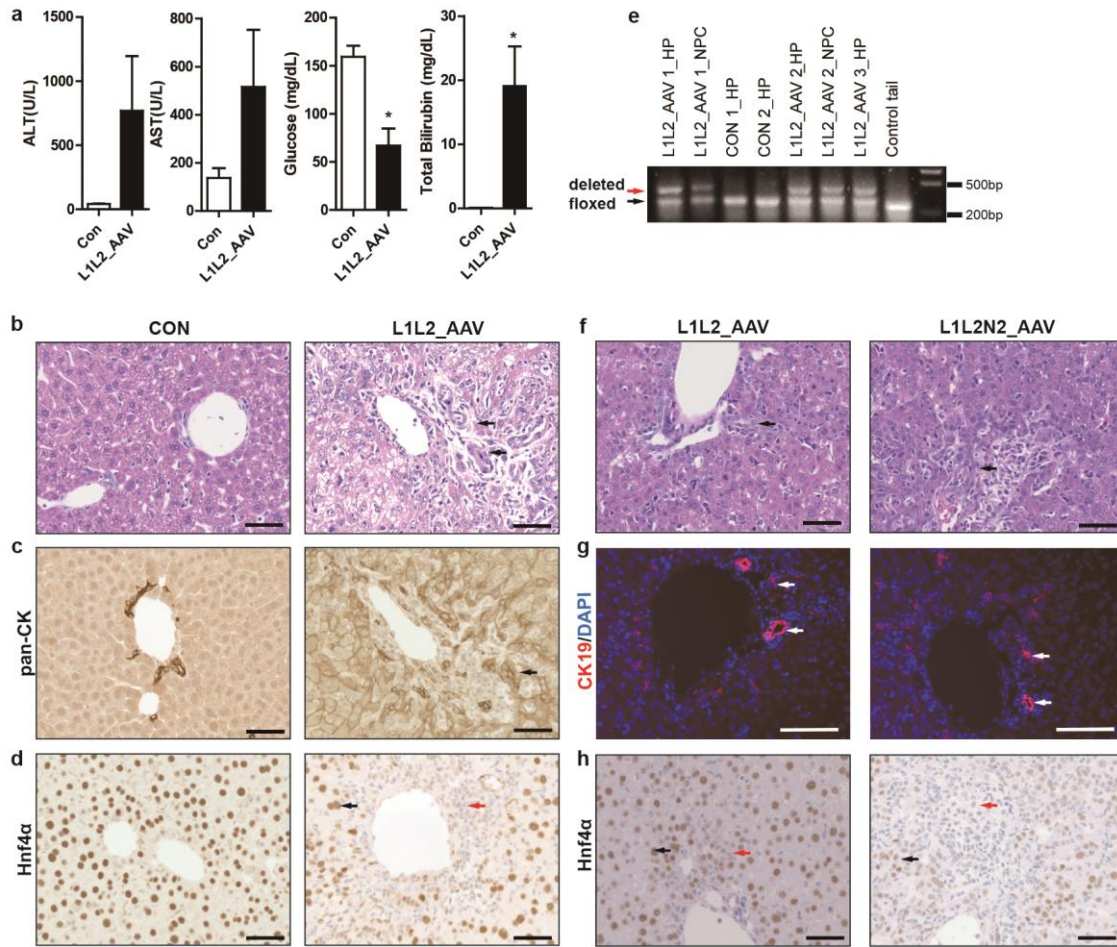

**Supplementary Figure 6. Hepatocyte-specific deletion of Lats1/2 using the AAV-TBG-cre virus**

**also induces biliary cell transition** (a) Serum test against alanine aminotransferase (ALT), aspartate aminotransferase (AST), glucose and total bilirubin in control and L1L2\_AAV mice blood ( $n=3$ ). (b-d) Representative images of H&E staining (b) and immunohistochemical staining obtained with anti-panCK (c) and anti-Hnf4 $\alpha$  (d) in control and L1L2\_AAV livers. Black arrows in (b and c) indicate immature biliary epithelial cells. Black arrow in (d) indicates positive signal to anti-Hnf4a and red arrow indicates negative signal to anti-Hnf4a. Scale bars in (b-d) indicate 50  $\mu\text{m}$  (e) Recombination PCR of Lats2 from control and L1L2\_AAV hepatocytes or non-parenchymal cell fractions. (f-h) Representative images of staining H&E (f) and immunostaining obtained with anti-CK19 (g) and anti-Hnf4 $\alpha$  (h) in L1L2\_AAV and L1L2N2\_AAV livers. Scale bars in (e) and (h) indicate 50  $\mu\text{m}$  and scale bars in (g) indicate 100  $\mu\text{m}$ . Scale bars indicate 50  $\mu\text{m}$ ; the data are presented as means  $\pm$  SEM;  $n=3$ , \* $p < 0.05$  (Student's  $t$ -test).

# Supplementary Figure 7

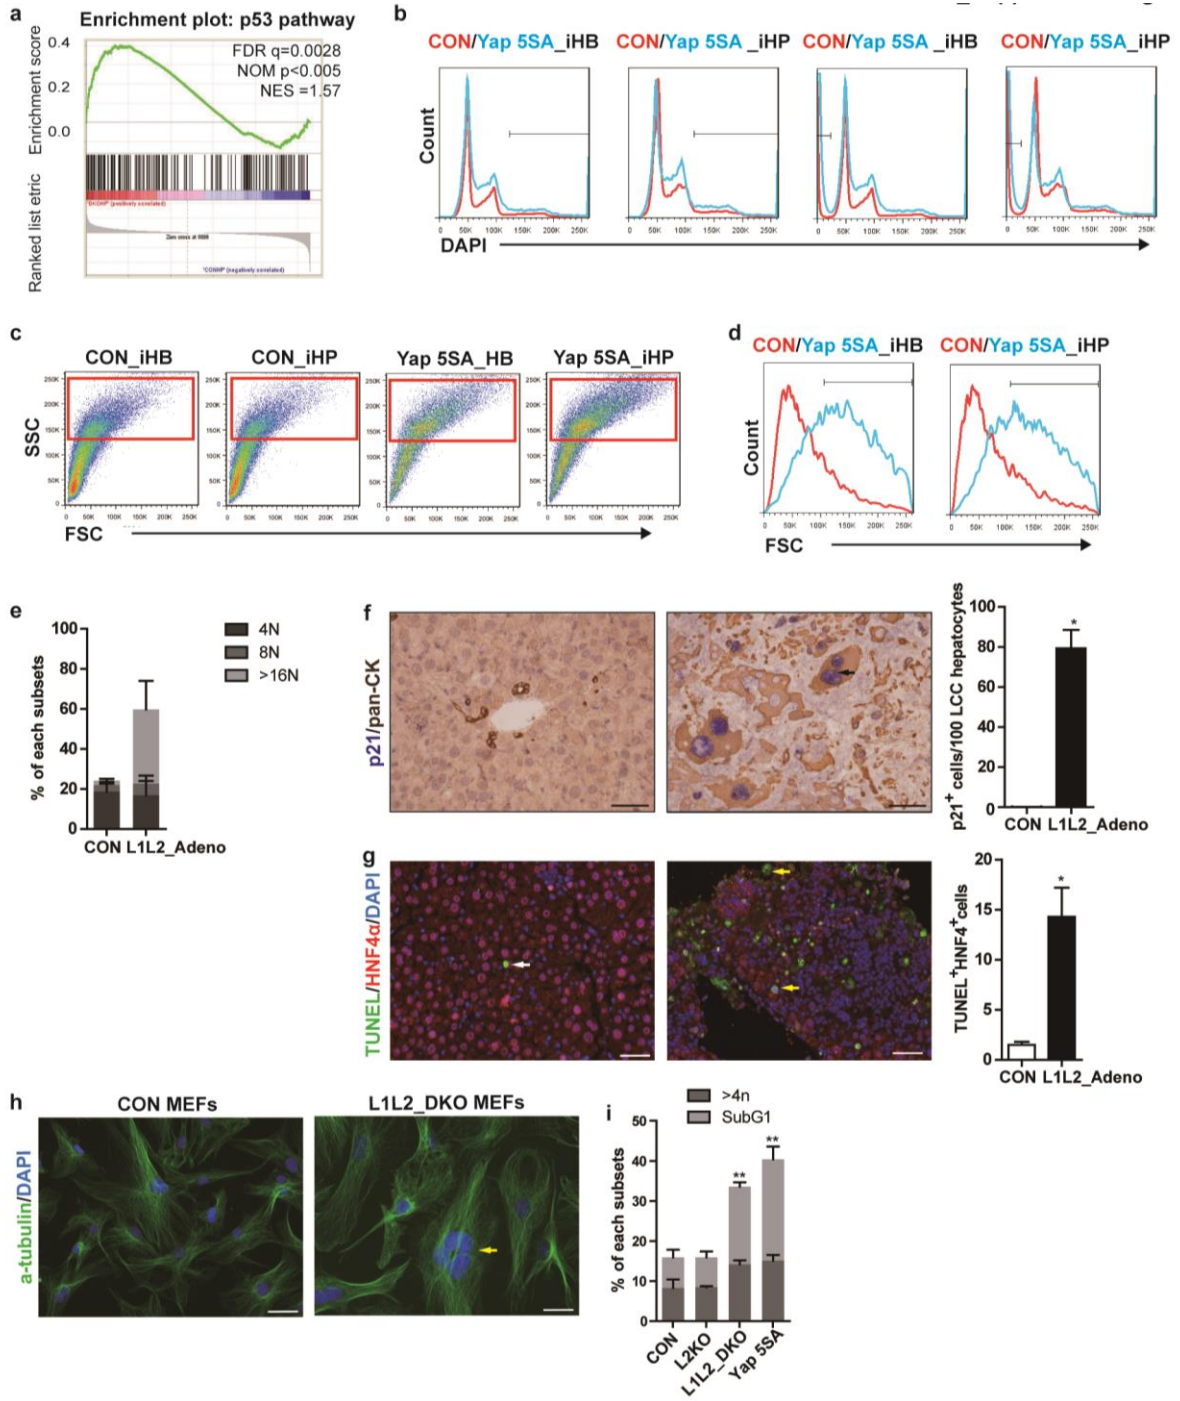

**Supplementary Figure 7. Activated Yap-expressing hepatocytes or MEFs show enlargement, polyploidy and p53 pathway activation** (a) Representative GSEA plot of p53 pathway genes that show up-regulation between control and Lats1/2-deficient iHPs. (b) Representative histogram shows >4n gating (first and second) and subG1 gating (third and fourth). (c) Representative FACS plots of live singlets and red rectangles indicate populations that were increased by over-expression of YAP 5SA. (d) Representative histogram about cell size of >4n gated cells. (e) Bar graphs of DNA contents, as measured by FACS of control and L1L2\_Adeno livers. (f) Representative immunostaining images obtained with anti-p21 and anti-panCK in control and L1L2\_Adeno livers and their quantifications. Scale bars indicate 50  $\mu\text{m}$  (g) TUNEL assay performed by immunofluorescence staining with antibodies against HNF4 $\alpha$  and their quantification. The white arrow indicates TUNEL-positive signals, while the yellow arrow indicates Yap and TUNEL double-positive signals. Scale bars indicate 100  $\mu\text{m}$ . (h and i) Representative immunofluorescence staining with anti-tubulin (h) and DNA content analysis (i) of Lats1 and -2 knockout MEFs. Scale bars indicate 100  $\mu\text{m}$ .

The data are presented as means  $\pm$  SEM;  $n=3$ , \* $p < 0.05$  and \*\* $p < 0.01$  (Student's  $t$ -test).

## Supplementary Figure 8

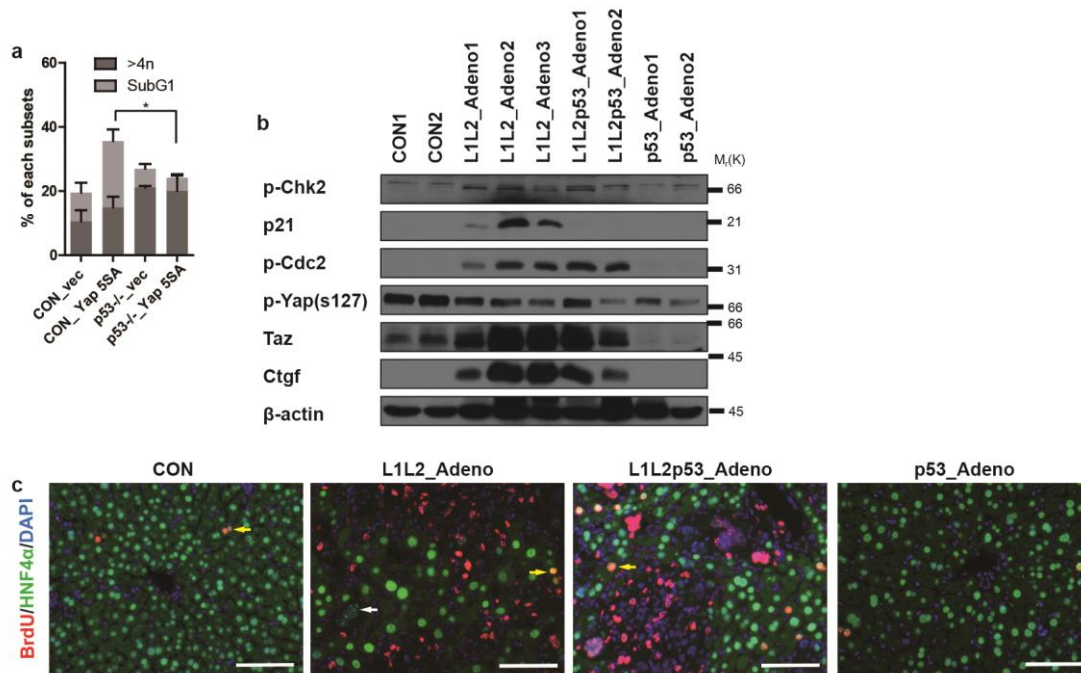

**Supplementary Figure 8. Depletion of p53 rescues Yap-dysregulation-induced apoptosis and senescence in MEFs and livers** (a) Bar graphs representing polyploidy and apoptosis in YAP 5SA over-expressing, control and p53<sup>-/-</sup> MEFs, as assessed by FACS. (b) Western blot analysis of protein extracts from control, L1L2\_Adeno, L1L2p53\_Adeno and p53\_Adeno livers. (c) BrdU incorporation assay of livers from mice of the indicated genotypes. Yellow arrows indicate Hnf4a and BrdU double-positive signals.

Scale bars indicate 100  $\mu$ m. The data are presented as means  $\pm$  SEM;  $n=3$ , \* $p < 0.05$  (Student's  $t$ -test).

## Supplementary Figure 9

Figure 3b

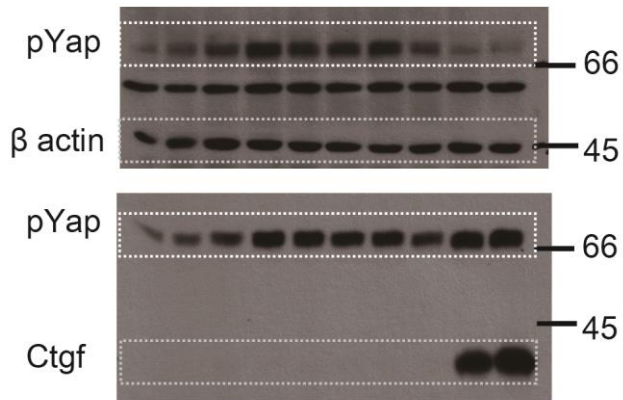

Supplementary Figure 1a

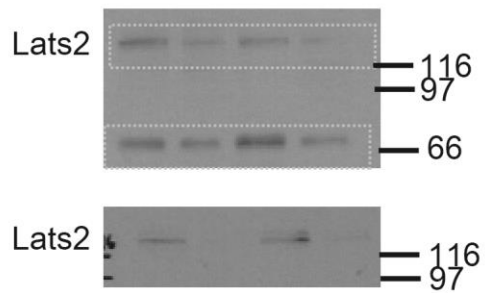

Supplementary Figure 8b

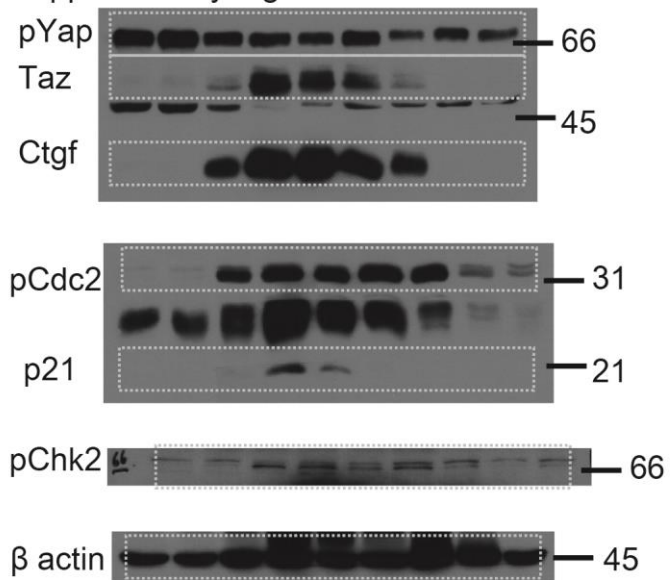

## Supplementary Table 1

Gene Lists of Heat map in Supplementary Figure2d

Biliary epithelial cell markers

|         | CON P1 | L1L2_Al b P1 |
|---------|--------|--------------|
| KRT7    | 0.001  | 1.040451     |
| KRT19   | 0.001  | 0.783539     |
| JAG1    | 0.001  | 0.720546     |
| FOXA2   | 0.001  | 0.562541     |
| TGFB2   | 0.001  | 0.373114     |
| ONECUT2 | 0.001  | 0.358512     |
| OPN3    | 0.001  | 0.219247     |
| TGFB3   | 0.001  | 0.138849     |
| HNF1B   | 0.001  | 0.136638     |
| HES1    | 0.001  | 0.035092     |
| SALL4   | 0.001  | -0.01428     |
| TGFB1   | 0.001  | -0.01521     |
| NOTCH2  | 0.001  | -0.0163      |
| HEXB    | 0.001  | -0.07661     |
| HEXA    | 0.001  | -0.0859      |
| TBX3    | 0.001  | -0.08723     |
| DLK1    | 0.001  | -0.13988     |
| FOXA3   | 0.001  | -0.41788     |

Hepatocyte markers

|        | CON P1 | L1L2_Al b P1 |
|--------|--------|--------------|
| CYP7A1 | 0.0001 | -3.9248885   |
| G6PC   | 0.0001 | -1.7460995   |
| CPS1   | 0.0001 | -1.3435427   |
| HNF4A  | 0.0001 | -0.7895411   |
| ALB    | 0.0001 | -0.6913785   |
| STAT3  | 0.0001 | -0.4943089   |
| CEBPA  | 0.0001 | -0.4286007   |
| HGF    | 0.0001 | 0.1039662    |
| EGFR   | 0.0001 | 0.2025432    |
| OSMR   | 0.0001 | 0.3166884    |

Average fold change expression of gene in L1L2\_Al b P1 compared to expression of the gene in CON P1.

## Supplementary Table 2

Gene Lists of Heat map in Figure 3c

|         | CON    | L1L2_Alb |
|---------|--------|----------|
| CTGF    | 0.0001 | 4.41817  |
| ANKRD1  | 0.0001 | 3.64433  |
| CYR61   | 0.0001 | 3.019909 |
| BICC1   | 0.0001 | 2.430658 |
| DAB2    | 0.0001 | 2.327472 |
| PMP22   | 0.0001 | 1.714854 |
| SCHIP1  | 0.0001 | 1.672068 |
| DUSP1   | 0.0001 | 1.557649 |
| GAS6    | 0.0001 | 1.482333 |
| GADD45B | 0.0001 | 1.284985 |
| SGK1    | 0.0001 | 1.243097 |
| TGFB2   | 0.0001 | 1.239459 |
| CRIM1   | 0.0001 | 1.148064 |
| AMOTL2  | 0.0001 | 1.099137 |
| TSPAN3  | 0.0001 | 1.05384  |
| MARCKS  | 0.0001 | 0.993043 |
| FSCN1   | 0.0001 | 0.858903 |
| PDLIM2  | 0.0001 | 0.801242 |
| EMP2    | 0.0001 | 0.786937 |
| PHGDH   | 0.0001 | 0.732843 |
| LHFP    | 0.0001 | 0.720172 |
| TGM2    | 0.0001 | 0.620576 |
| FLNA    | 0.0001 | 0.452436 |
| DDAH1   | 0.0001 | 0.395361 |
| STMN1   | 0.0001 | 0.392695 |
| MDFIC   | 0.0001 | 0.315468 |
| SDPR    | 0.0001 | 0.161111 |
| CDC20   | 0.0001 | 0.133092 |
| ETV5    | 0.0001 | 0.116579 |
| AXL     | 0.0001 | 0.089897 |
| SHCBP1  | 0.0001 | 0.045979 |
| ECT2    | 0.0001 | -0.01239 |
| BIRC5   | 0.0001 | -0.04374 |
| THBS1   | 0.0001 | -0.04451 |
| DUT     | 0.0001 | -0.09466 |
| FSTL1   | 0.0001 | -0.15144 |
| ITGB2   | 0.0001 | -0.20685 |
| NDRG1   | 0.0001 | -0.24775 |
| HEXB    | 0.0001 | -0.25448 |



|       |        |          |
|-------|--------|----------|
| TOP2A | 0.0001 | -0.28779 |
| TK1   | 0.0001 | -0.3052  |
| ITGB5 | 0.0001 | -0.77714 |

Average fold change expression of gene in L1L2\_Alb P1 compared to expression of the gene in CON P1.

### Supplementary Table 3

#### qRT-PCR primers for mRNA expression

| gene           | species | Forward                               | Reverse                            |
|----------------|---------|---------------------------------------|------------------------------------|
| Krt7           | mouse   | GAC CCT TCA CGA GAC<br>AGA GTT        | GCA ATC TCA TTC CGG GTG TTG        |
| Krt19          | mouse   | GGG GGT TCA GTA CGC<br>ATT GG         | GAG GAC GAG GTC ACG AAG C          |
| Hnf1b          | mouse   | GAA AGC AAC GGG AGA<br>TCC TC         | CCT CCA CTA AGG CCT CCC TC         |
| Hnf6           | mouse   | AGC CCT GGA GCA AAC<br>TCA AGT CG     | TGC ATG TAG AGT TCG ACG TTG<br>GAC |
| Notch2         | mouse   | ATG CAC CAT GAC ATC<br>GTT CG         | GAT AGA GTC ACT GAG CTC TCG        |
| Hey1           | mouse   | AGA AGG CTG GTA CCC<br>AGT GCC TT     | CAA ACT CCG ATA GTC CAT AGC<br>CA  |
| Sox9           | mouse   | GAG CCG GAT CTG AAG<br>AAG GA         | GCT TGA CGT GTG GCT TGT TC         |
| Hes1           | mouse   | CCA GCC AGT GTC AAC<br>ACG A          | AAT GCC GGG AGC TAT CTT TCT        |
| Hnf4a          | mouse   | CAC GCG GAG GTC AAG<br>CTA C          | CCC AGA GAT GGG AGA GGT<br>GAT     |
| Cyp7a1         | mouse   | AGC AAC TAA ACA ACC<br>TGC CAG TAC TA | GTC CGG ATA TTC AAG GAT GCA        |
| Albumin        | mouse   | CGA GAA GCT TGG AGA<br>ATA TGG        | GTC AGA GCA GAG AAG CAT GG         |
| Cebpa          | mouse   | GAA CAG CAA CGA GTA<br>CCG GGT A      | CCC ATG GCC TTG ACC AAG GAG        |
| Ankrd1         | mouse   | CGA CTC TTG ATG ACC<br>TTC GG         | ATT GCT TTG GTT CCA CTC TG         |
| Cyr61          | mouse   | CCC CCG GCT GGT GAA<br>AGT            | GCG GTT CGG TGC CAA AGA            |
| Ctgf           | mouse   | GGG CCT CTT CTG CGA<br>TTT C          | ATC CAG GCA AGT GCA TTG GTA        |
| Tgfb2          | mouse   | TGG AGT TCA GAC ACT<br>CAA CAC A      | AAG CTT CGG GAT TTA TGG TGT        |
| Vimentin       | mouse   | CGG CTG CGA GAG AAA<br>TTG C          | CCA CTT TCC GTT CAA GGT CAA<br>G   |
| $\beta$ -actin | mouse   | GAA ATC GTG CGT GAC<br>ATC AAA G      | TGT AGT TTC ATG GAT GCC ACA<br>G   |
| Collagen I     | mouse   | GCT CCT CTT AGG GGC<br>CAC T          | CCA CGT CTC ACC ATT GGG G          |

#### qRT-PCR primers for Chromatin immunoprecipitation analysis

|          |       |                                  |                                |
|----------|-------|----------------------------------|--------------------------------|
| Tgfb2 R1 | mouse | GAG ATT TGG AGG AGC AGG<br>GCT G | CGG CGA CTT TCC CAT GAC<br>TTC |
| Tgfb2 R2 | mouse | TGC TGG CCT AAT GAA GTG<br>GAA   | GGT CCT GAG TTC AAG TCC<br>CAG |
| Tgfb2 R3 | mouse | TGA AAC CTC AAG TCC ACC<br>CCC C | GCT CTA AAC ACC ACA GCC<br>CTC |

|          |       |                                |                                    |
|----------|-------|--------------------------------|------------------------------------|
| Hnf4a R1 | mouse | ACC CTG TGC TGC CAG TTT<br>CTC | CCT GGT CCC AAG GTT ATC<br>CTT     |
| Hnf4a R2 | mouse | AAG GCT GAG GCA GGA GTG<br>TCA | CTC ACC CCC AAA CCA TCA<br>TTT     |
| Hnf4a R3 | mouse | GGC CCT ATC TTC GGG CCC<br>CTG | GTG CCT CCT GTC ACA ATC<br>ACT     |
| Pou5f1   | mouse | GGC AGA CGG CAG ATG CAT<br>AAC | CTC AAT AGC AGA TTA AGG<br>AAG GGC |
| Ctgf     | mouse | CAA TCC GGT GTG AGT TGA TG     | GGC GCT GGC TTT TAT ACG            |
